# Supplementary material for: Defects in mitophagy promote redox-driven metabolic syndrome in the absence of TP53INP1
Source: PubMed Central journal article supplement (PMC4459819; doi:10.15252/emmm.201404318), 2015-03-31

**Uncropped gels used for Figure 5.A**

| NT  |     | H2O2 |     | NAC |     |
|-----|-----|------|-----|-----|-----|
| +/+ | -/- | +/+  | -/- | +/+ | -/- |

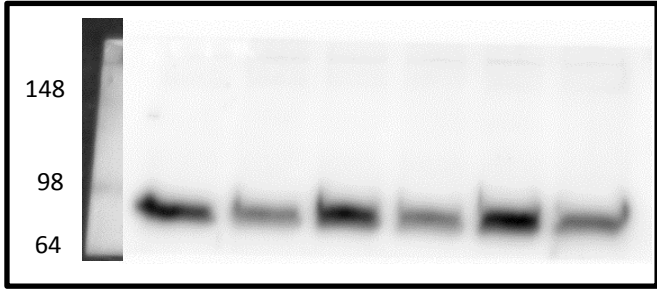

**WB PGC-1α**

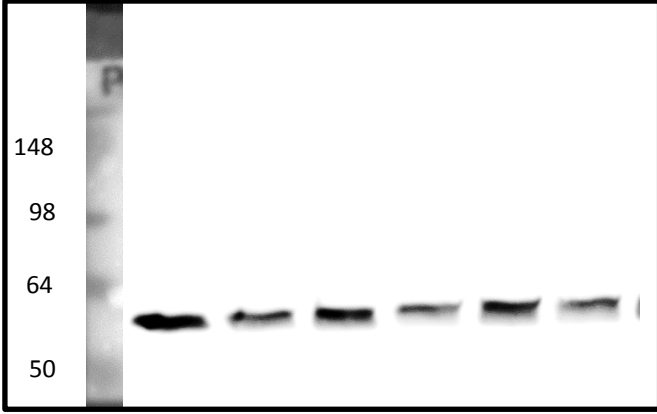

**WB PARKIN**

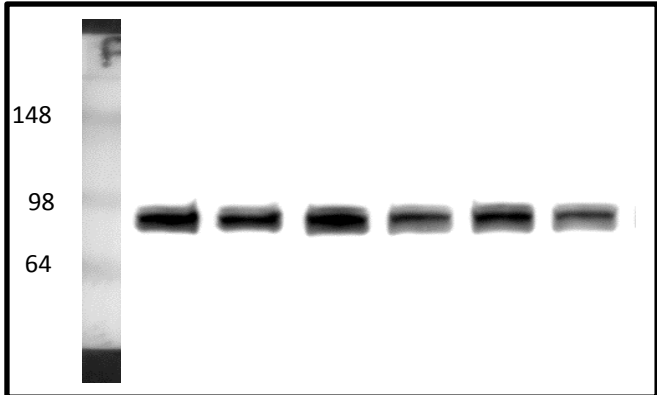

**WB PINK1**

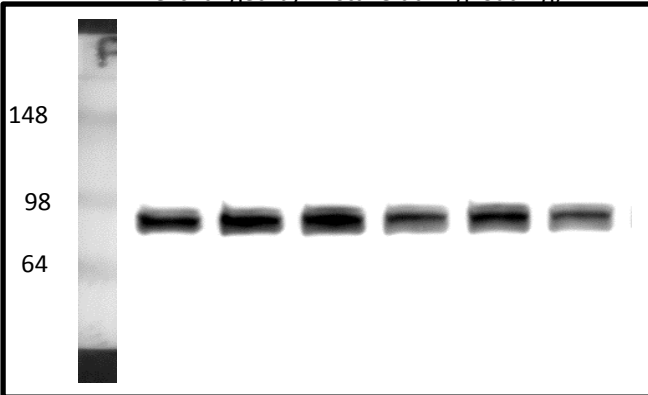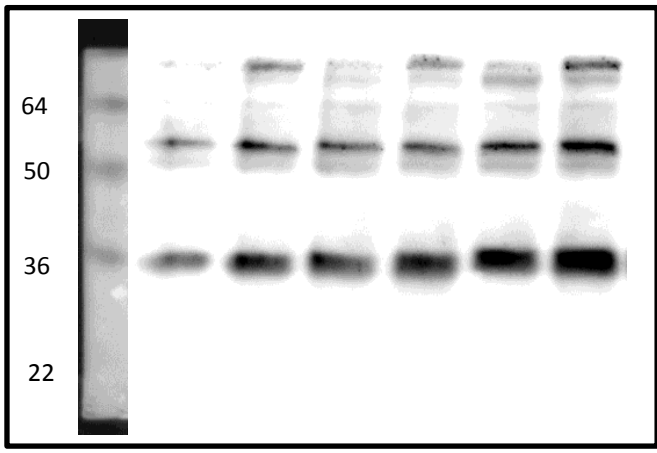

**WB BNIP3**

**Uncropped gels used for Figure 5.A**

NT                    H2O2                    NAC  
+/+    -/-            +/+    -/-            +/+    -/-



WB PGC-1α

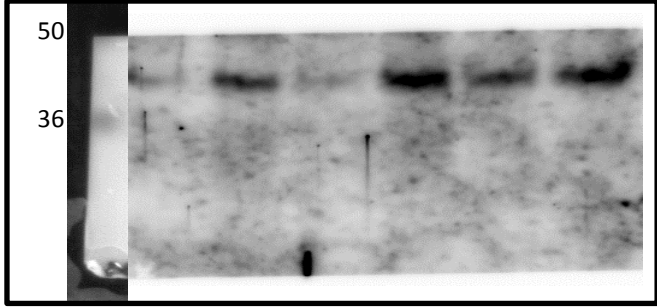

WB NIX

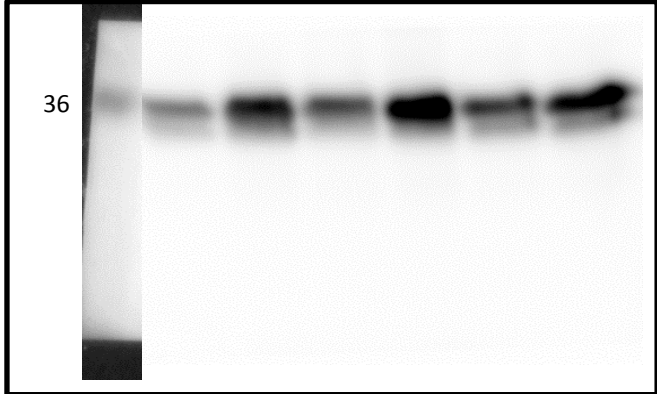

WB VDAC

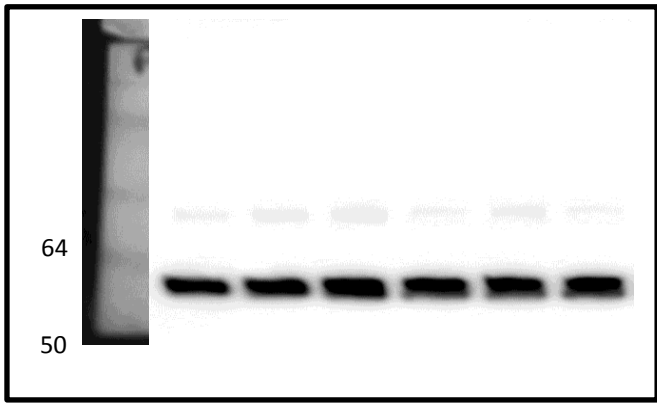

WB β-tubulin

**Uncropped gels used for Figure 5.B**

|                    |   |   |   |  |   |   |   |
|--------------------|---|---|---|--|---|---|---|
| INP1 $\alpha$ NTAP | - | + | - |  | - | + | - |
| INP1 $\beta$ NTAP  | - | - | + |  | - | - | + |

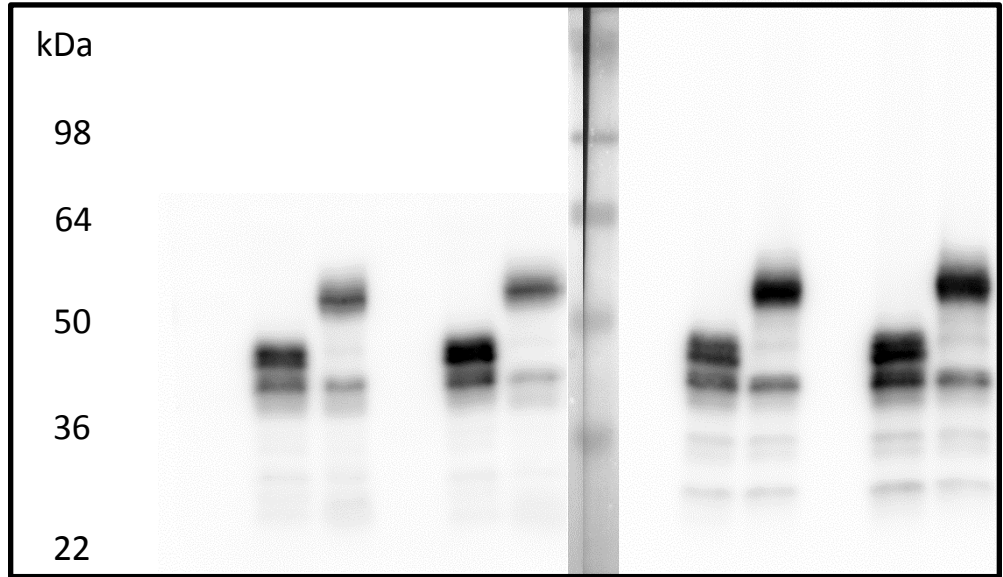

**WB TP53INP1**

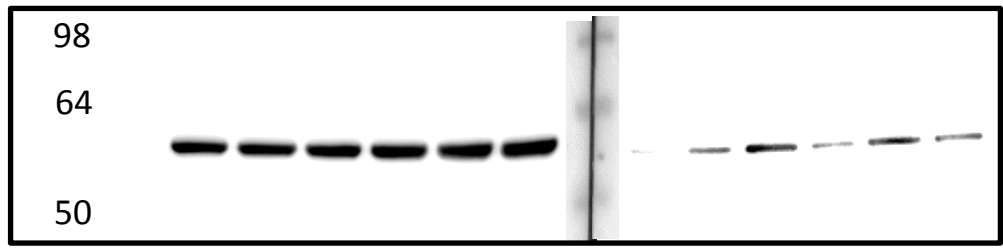

**WB PARKIN**

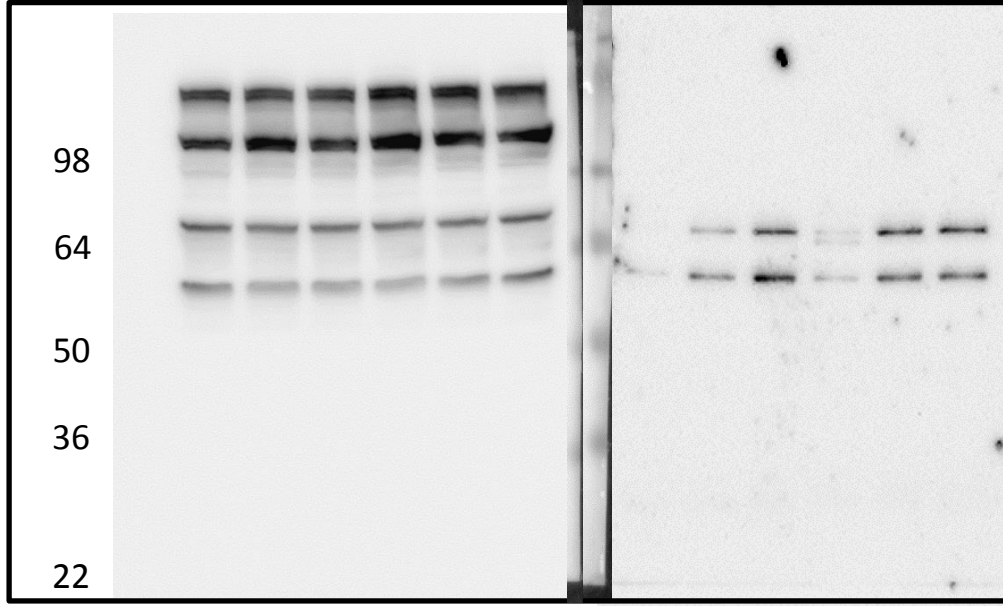

**WB PINK**

**TCL**

**IP Strep**

**Uncropped gels used for Figure 5.B**

|                    |   |   |   |   |   |   |
|--------------------|---|---|---|---|---|---|
| INP1 $\alpha$ NTAP | - | + | - | - | + | - |
| INP1 $\beta$ NTAP  | - | - | + | - | - | + |

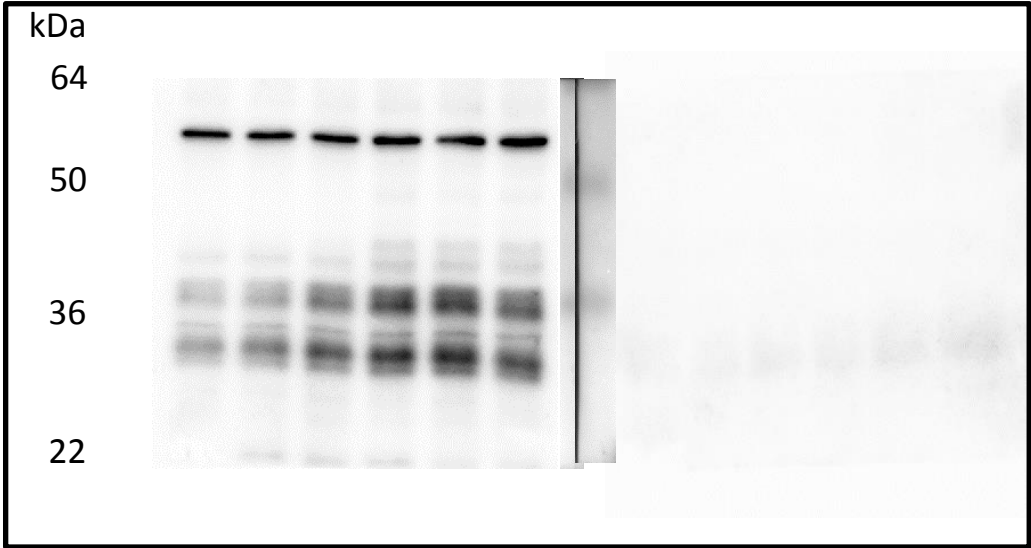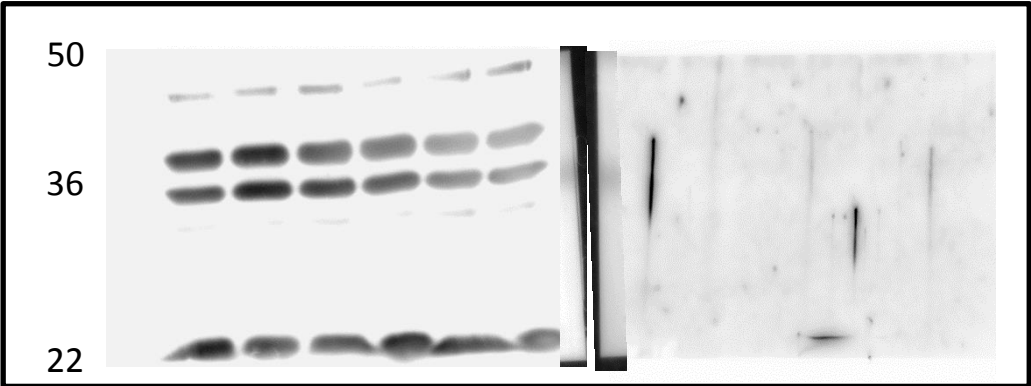

TCL

IP Strep

# Uncropped gels used for Figure 5.C

TCL and mitochondrial lysates were run on different gels but revealed in the same time

## TCL

WT1 WT2 WT3 KO1 KO2 KO3

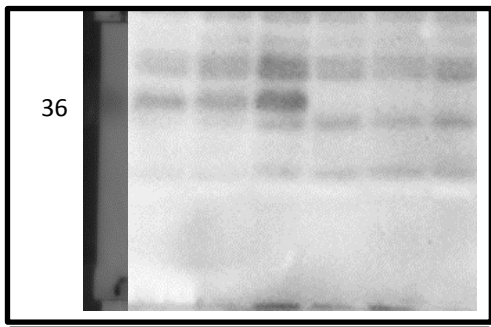

WB TP53INP1

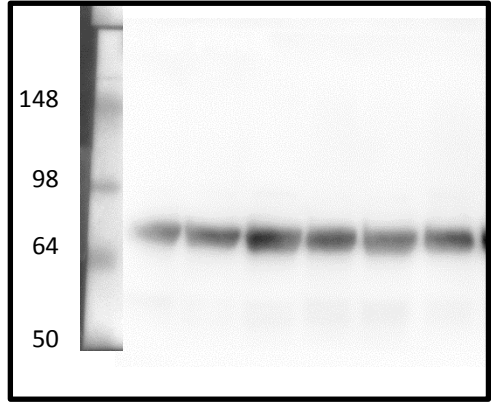

WB PINK

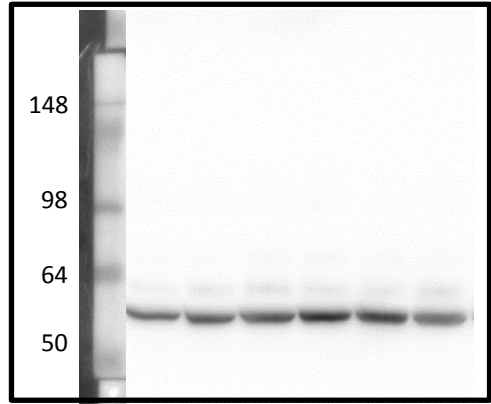

WB PARKIN

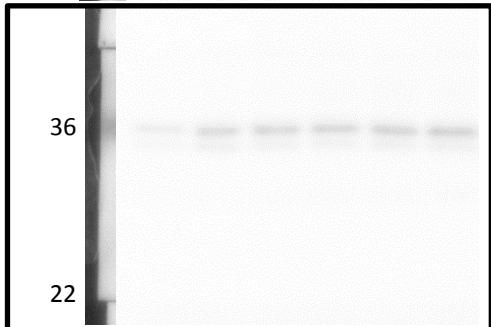

WB VDAC

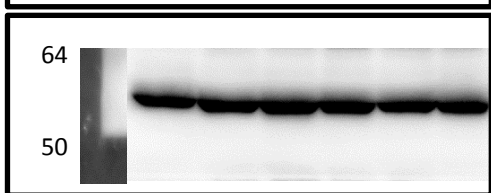

WB  $\beta$ -tubulin

## Mito

WT1 WT2 WT3 KO1 KO2 KO3

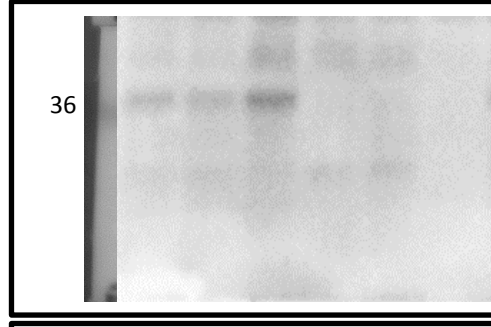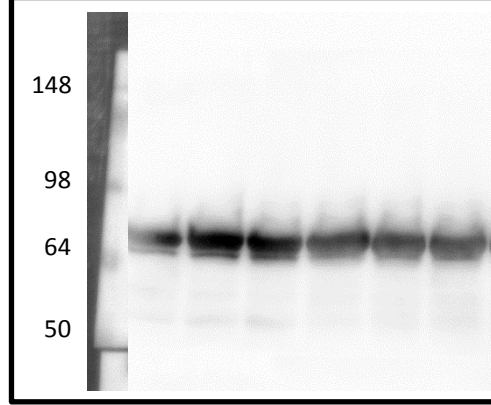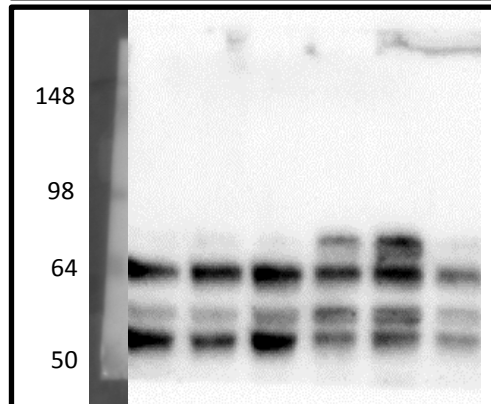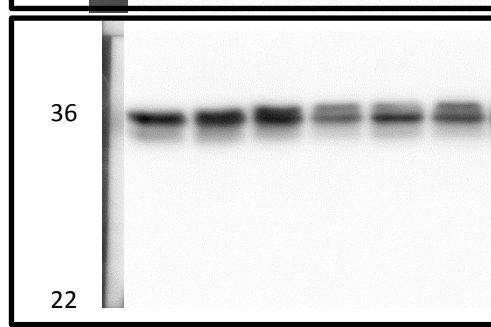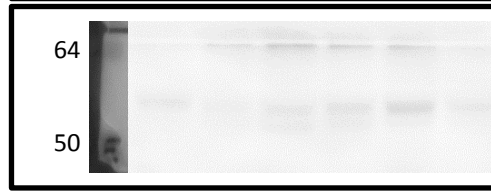

Supplement: emmm0007-0802-sd4.pdf [file emmm0007-0802-sd4.pdf]
