# Supplementary material for: Defects in mitophagy promote redox-driven metabolic syndrome in the absence of TP53INP1
Source: PubMed Central journal article supplement (PMC4459819; doi:10.15252/emmm.201404318), 2015-03-31

**Uncropped gels used for Figure 6**

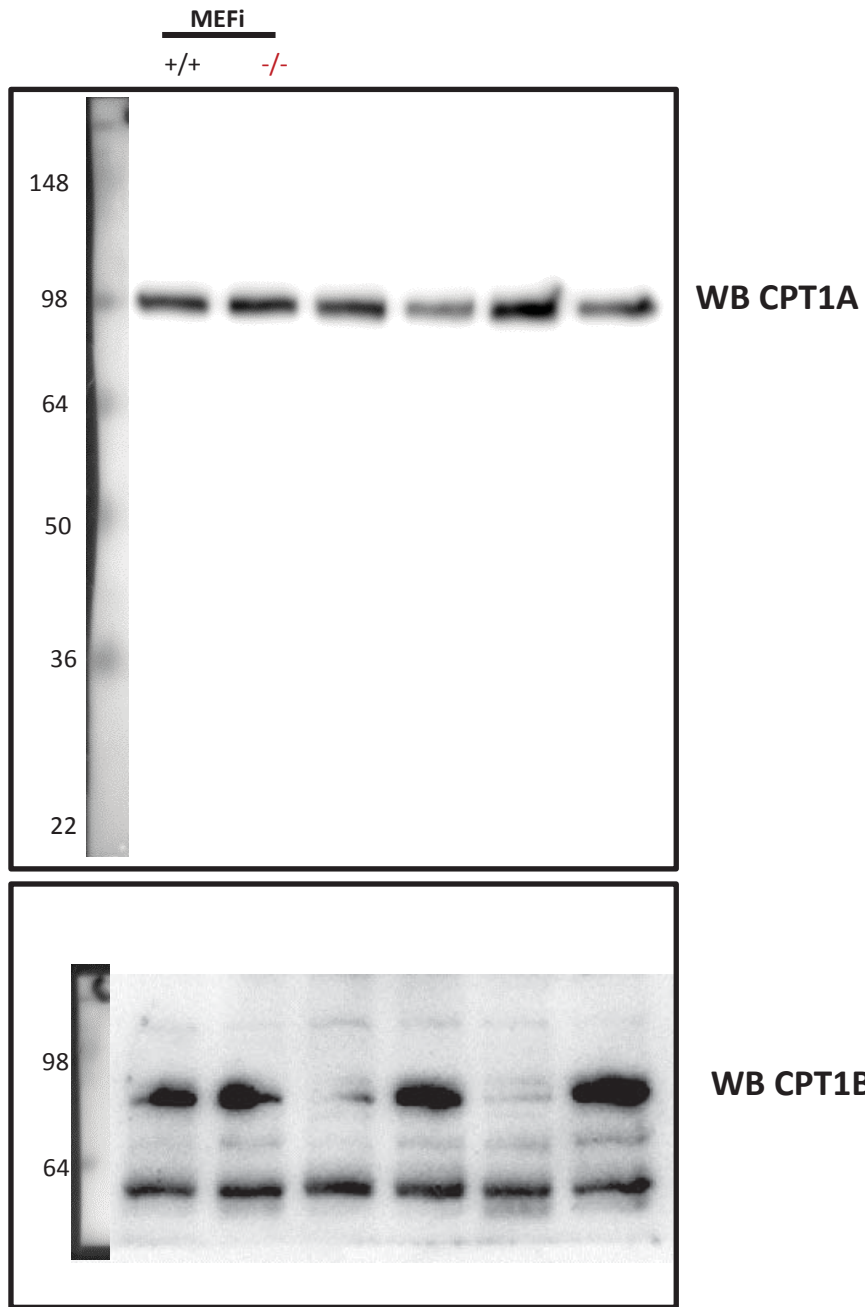

Uncropped gels used for Figure 6

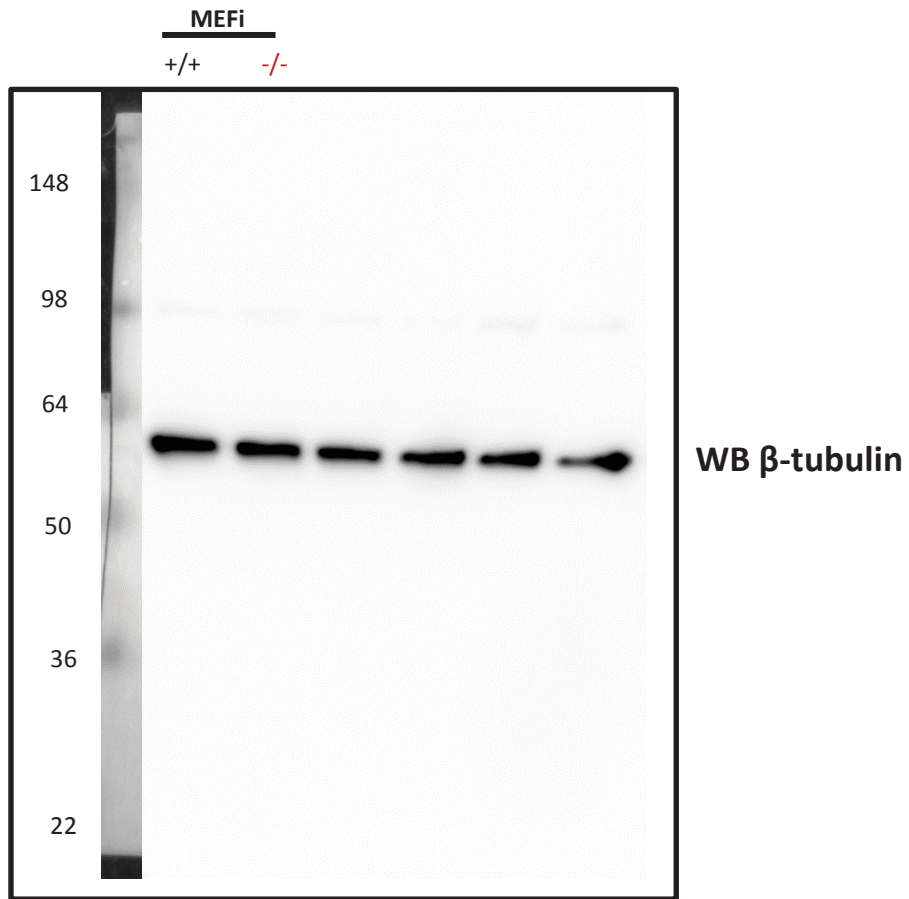

Supplement: emmm0007-0802-sd5.pdf [file emmm0007-0802-sd5.pdf]
